# Supplementary material for: GP2-enriched pancreatic progenitors give rise to functional beta cells in vivo and eliminate the risk of teratoma formation
Source: PubMed Central journal article supplement — Stem Cell Reports. 2022 Mar 31;17(4):964–78. doi: 10.1016/j.stemcr.2022.03.004 (PMC9023812; doi:10.1016/j.stemcr.2022.03.004), 2022-03-31
Supplement: mmc1.pdf [file mmc1.pdf]

**Stem Cell Reports, Volume 17**

**Supplemental Information**

**GP2-enriched pancreatic progenitors give rise to functional beta cells  
*in vivo* and eliminate the risk of teratoma formation**

**Yasaman Aghazadeh, Farida Sarangi, Frankie Poon, Blessing Nkennor, Emily C. McGaugh, Sara S. Nunes, and M. Cristina Nostro**

## **Supplemental Information**

**GP2-enriched pancreatic progenitors give rise to functional beta cells *in vivo* and eliminate the risk of teratoma formation**

Yasaman Aghazadeh, Farida Sarangi, Frankie Poon, Blessing Nkenkor, Emily C. McGaugh,

Sara S. Nunes, M. Cristina Nostro.

Supplementary Figure 1

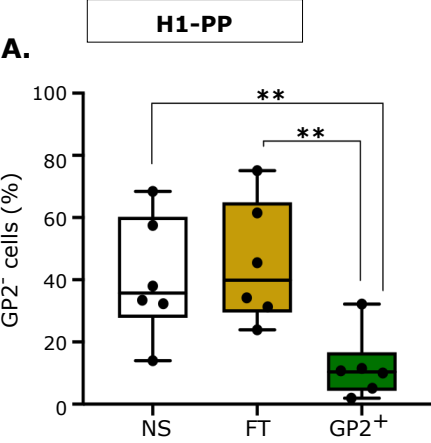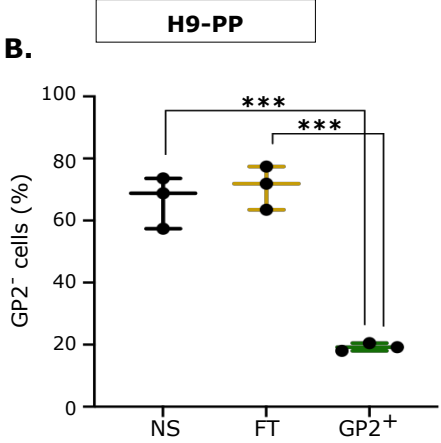

***Supplementary Figure 1. Related to Figure 1.*** (A-B) Frequency of GP2 negative (GP2-) cells in NS, FT and GP2<sup>+</sup> cell populations after MACS in H1 (A) and H9 (B)- derived cells. (A, n=6 independent experiments; B, n=3 independent experiments; One-way ANOVA analysis with Tukey's multiple comparisons; \*\* P < 0.01, \*\*\* P < 0.0001, error bars represent S.E.M.).

## Supplementary Figure 2

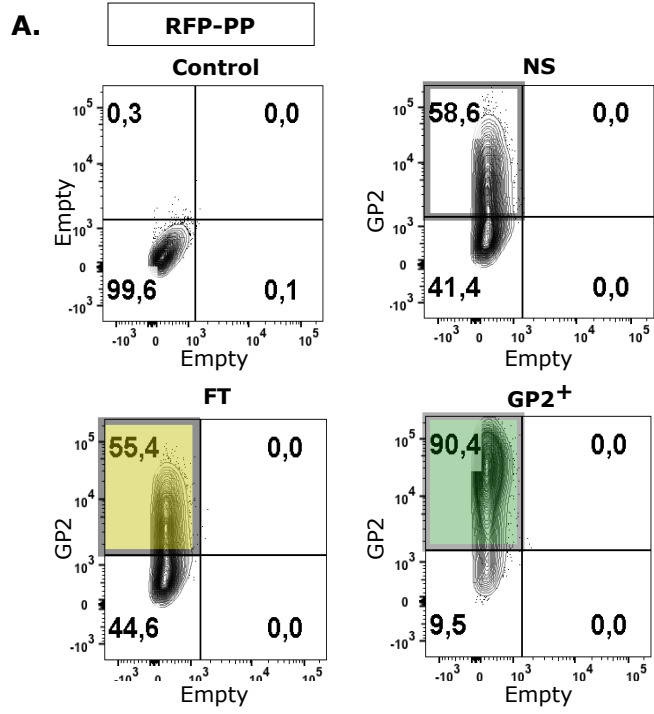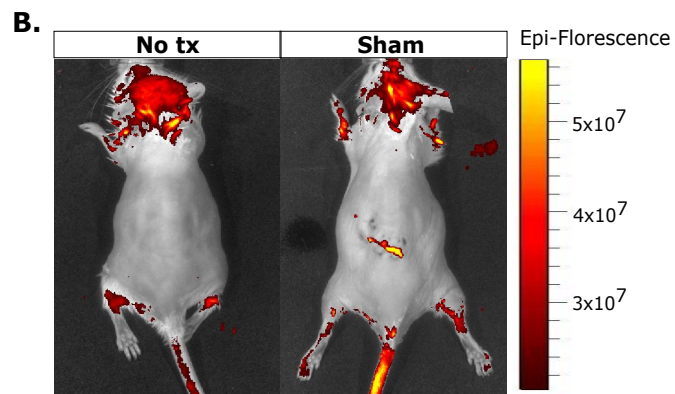

***Supplemental Figure 2. Related to Figure 2.*** (A) Flow cytometry plot quantifying GP2 expression in RFP-H1-derived PPs at stage 4. (B) Live imaging of mice without transplantation (No Tx), or transplantation of an empty collagen hydrogel (sham) at week 1 post-transplantation.

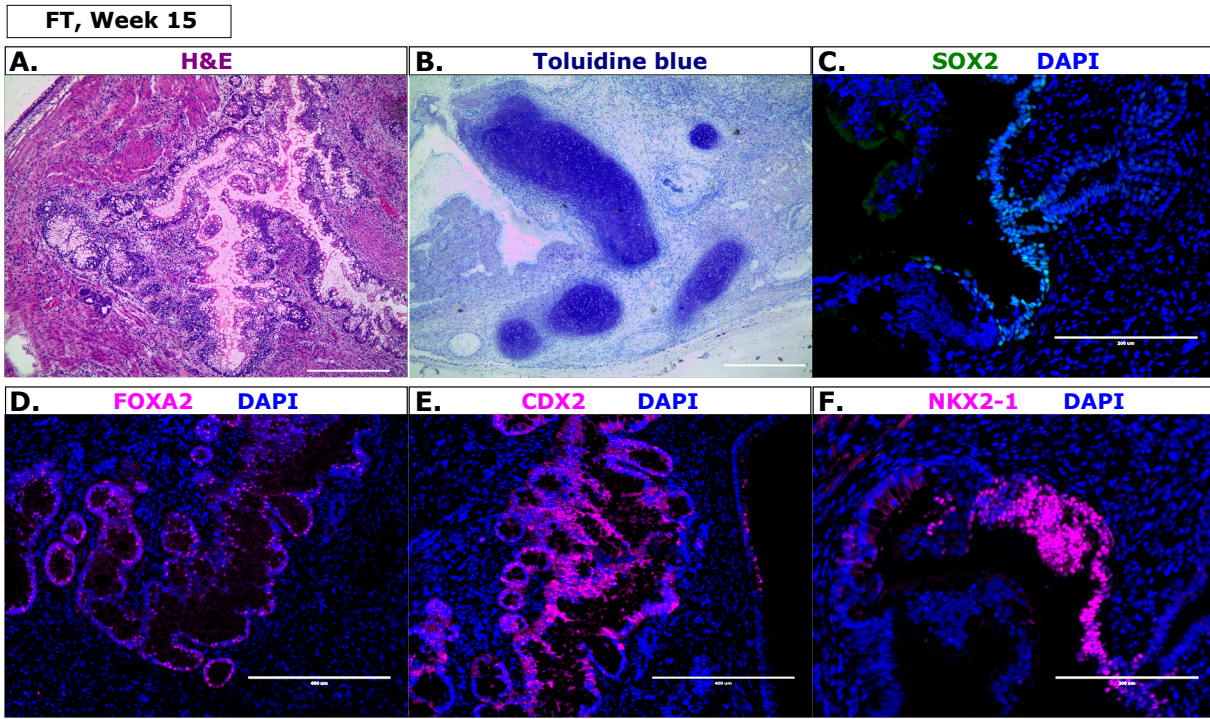

***Supplemental Figure 3. Related to Figure 2.*** (A-F) Representative images of FT-derived outgrowths stained with H&E (A), toluidine blue (B), and immunostained using SOX2 (C), FOXA2 (D), CDX2 (E), and NKX2-1 (F) antibodies at week 15 post-transplantation. DAPI marks cell nuclei. (A, scale bar is 100 $\mu$ m; C & F, scale bar is 200 $\mu$ m; B, D, E, scale bar is 400 $\mu$ m).



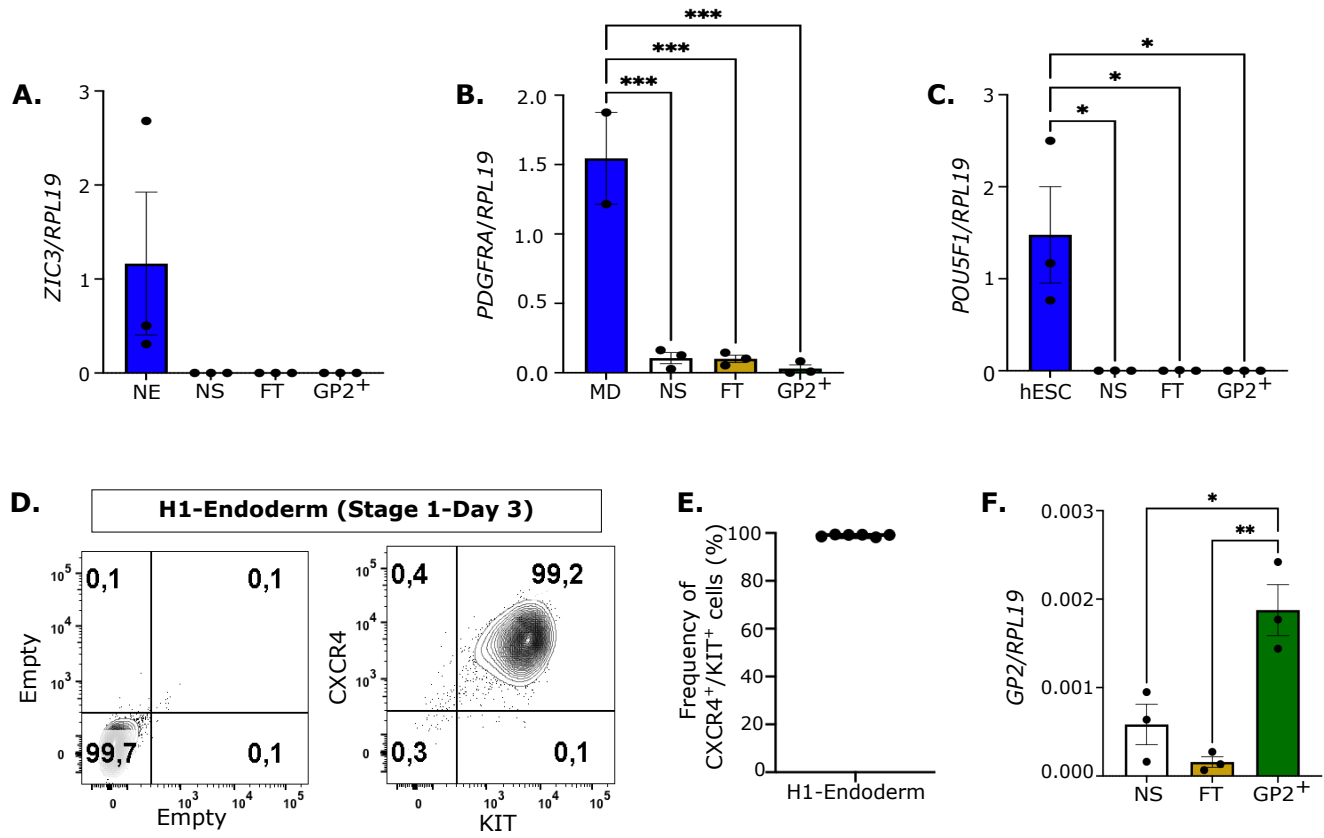

**Supplementary Figure 4. Related to Figure 3.** (A-C) RT-PCR quantification of *ZIC3* (neuroectoderm marker), *PDGFRA* (mesoderm marker) and *POU5F1* (pluripotency marker) levels in NS, FT and GP2<sup>+</sup> cell fractions after MACS normalized to *RPL19* housekeeping gene. HESC-derived NE (neuroectoderm), MD (mesoderm), and undifferentiated hESCs are used as a positive control (NE, NS, FT, GP2<sup>+</sup>, hESC, n=3 independent experiments; MD, n=2 independent experiments; One-way ANOVA analysis with Tukey's multiple comparisons; \* P< 0.05, \*\*\* P<0.001). (D, E) Representative flow cytometry plot and quantification of CXCR4 and KIT expression in hESC-derived endodermal cells, indicating robust differentiation efficacy (~ 100%). (F) RT-PCR quantification of *GP2* levels normalized to *RPL19* housekeeping gene in NS, FT, and GP2<sup>+</sup> fractions after MACS confirming enrichment of GP2<sup>+</sup> cells (n=3 independent experiments; One-way ANOVA analysis with Tukey's multiple comparisons; \* P< 0.05, \*\* P<0.01).

Supplementary Figure 5

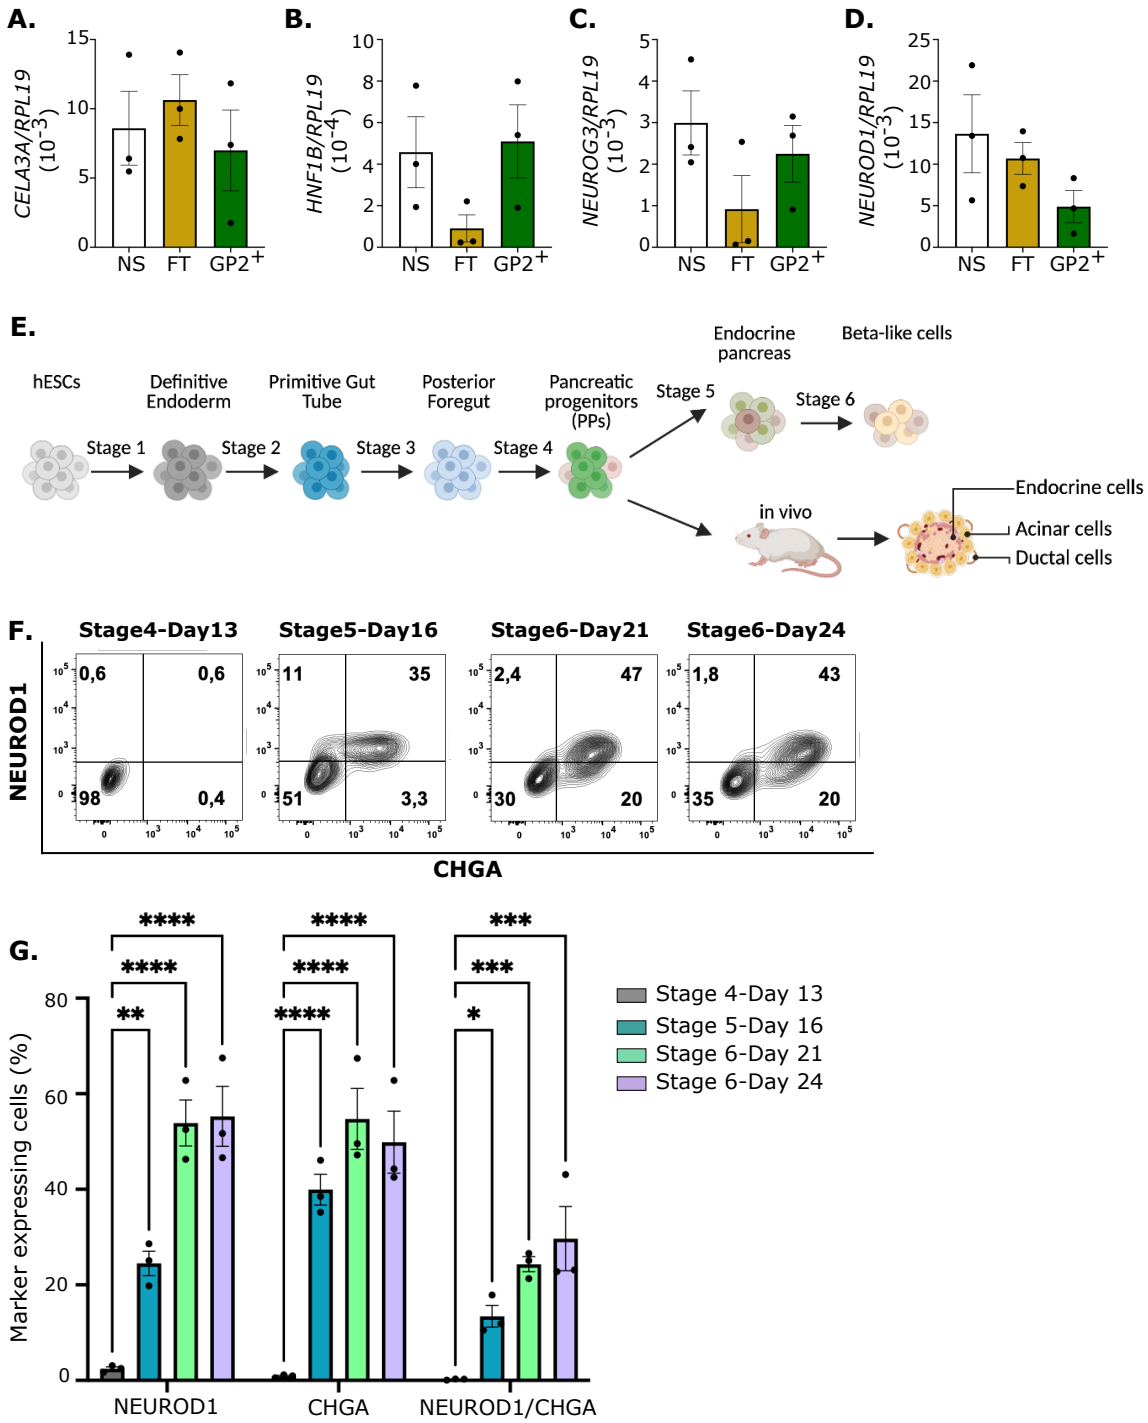

**Supplementary Figure 5. Related to Figure 3.** (A-D) RT-PCR quantification of *CELA3A* (acinar marker), *HNFBI* (ductal marker), *NEUROG3* and *NEUROD1* (endocrine markers) normalized to *RPL19* housekeeping gene in NS, FT and GP2<sup>+</sup> fractions after MACS. (E) Schematic of hESC differentiation to PP (Stage 4, Days 8-13), which can be transplanted *in vivo* to generate endocrine pancreas, acinar and ductal cells or differentiated *in vitro* to endocrine pancreatic cells (Stage 5, Days 13-16), and Beta-like cells (Stage 6, Days 16-24). (F) Representative flow cytometry plots of NEUROD1 and Chromogranin (CHGA) expression, which indicates commitment to the endocrine pancreas. (G) Quantification of the frequency of endocrine-committed cells at various differentiation stages. (n=3 independent experiments; One-way ANOVA with Tukey's multiple comparisons; \* P<0.05, \*\* P<0.01, \*\*\* <0.001, \*\*\*\* P<0.0001).

**Supplementary Tables:**

**Supplementary Table 1.** List of antibodies used for immunostaining (I) and/or flow cytometry (F). Related to Figures 1-5.

| Antigen                      | Species | Vendor                               | Dilution              |
|------------------------------|---------|--------------------------------------|-----------------------|
| CDX2                         | Rabbit  | Abcam                                | 1:300 (I), 1:2000 (F) |
| Chromogranin A (CHGA)        | Rabbit  | Abcam                                | 1:100 (I), 1:1000 (F) |
| CD117 (KIT)-PE conjugated    | Mouse   | Invitrogen                           | 1:100 (F)             |
| CD184 (CXCR4)-APC conjugated | Mouse   | BD Biosciences                       | 1:200 (F)             |
| Cytokeratin 19 (KRT19)       | Rabbit  | Abcam                                | 1:800 (I)             |
| C-peptide                    | Rat     | Developmental Studies Hybridoma Bank | 1:1000 (I)            |
| FOXA2                        | Rabbit  | Abcam                                | 1:500 (I)             |
| Glucagon (GCG)               | Mouse   | Sigma-Aldrich                        | 1:500 (I)             |
| GP2                          | Human   | MBL                                  | 1:800 (F)             |
| KI67                         | Rabbit  | Abcam                                | 1:1000 (I, F)         |
| KU80                         | Rabbit  | Cell Signaling                       | 1:450 (I)             |
| NKX2-1                       | Rabbit  | Abcam                                | 1: 250 (I)            |
| NKX6-1                       | Mouse   | Developmental Studies Hybridoma Bank | 1:1000 (F)            |
| NEUROD1-AF657 conjugated     | Mouse   | BD Bioscience                        | 1:3 (F)               |
| PDX1                         | Goat    | Abcam                                | 1:10000 (I)           |
| PDX1                         | Goat    | R&D Systems                          | 1:100 (F)             |
| SLC18A1                      | Rabbit  | Sigma                                | 1:1000 (I)            |
| Somatostatin (SST)           | Rabbit  | Abcam                                | 1:500 (I)             |
| SOX2                         | Rabbit  | Cell signaling                       | 1:400 (I, F)          |
| Trypsin (PRSS1)              | Sheep   | R&D Systems                          | 1:300 (I)             |
| IgG-AF488                    | Goat    | Jackson Immuno Research Labs         | 1:400 (F)             |
| IgG-AF488                    | Mouse   | Jackson Immuno Research Labs         | 1:800 (I)             |
| IgG-AF488                    | Rabbit  | Jackson Immuno Research Labs         | 1:800 (F)             |

|                                |        |                              |                      |
|--------------------------------|--------|------------------------------|----------------------|
| IgG-Cy5                        | Mouse  | Jackson Immuno Research Labs | 1:800 (I)            |
| IgG-Cy5                        | Rabbit | Jackson Immuno Research Labs | 1:800 (I)            |
| IgG-Cy5                        | Rat    | Jackson Immuno Research Labs | 1:800 (I)            |
| IgG-AF647                      | Mouse  | Jackson Immuno Research Labs | 1:400 (F), 1:800 (I) |
| IgG-AF549                      | Mouse  | Jackson Immuno Research Labs | 1:800 (I)            |
| IgG-AF549                      | Rabbit | Jackson Immuno Research Labs | 1:800 (I)            |
| IgG-R-Phycoerythrin-conjugated | Mouse  | Jackson Immuno Research Labs | 1:800 (F)            |

**Supplementary Table 2.** List of QPCR primers. *Related to Figures 3 and 4.*

| <i>Gene</i>    | <i>Forward primer (5' to 3')</i>           | <i>Reverse primer (3' to 5')</i>           |
|----------------|--------------------------------------------|--------------------------------------------|
| <i>CDX2</i>    | <i>AGC CAA CCT GGA CTT CCT GTC ATT</i>     | <i>ACA CAG ACC AAC AAC CCA AAC AGC</i>     |
| <i>CELA3A</i>  | <i>ATG ACA TGC CCC TCA TCA AGC TCT</i>     | <i>ATG TAG CAG GGT GTC TTG TTG GGA</i>     |
| <i>GP2</i>     | <i>AAC CCT TCC GAA GCA CAG AG</i>          | <i>GGA CAC AGG TCT CCG ACA TC</i>          |
| <i>HNF1B</i>   | <i>AGA GTA ACA TGC CAG CTT CCT CCT GTG</i> | <i>TAT CAA ACA GCC AGT TTC CCT CCT GCC</i> |
| <i>MKI67</i>   | <i>AAT TTG CTT CTG GCC TTC CC</i>          | <i>GAC CCC GCT CCT TTT GAT AGT</i>         |
| <i>NEUROD1</i> | <i>TCC CAT GTC TTC CAC GTT AAG CCT</i>     | <i>CAT CAA AGG AAG GGC TGG TGC AAT</i>     |
| <i>NEUROG3</i> | <i>GCG CAA TCG AAT GCA CAA CCT CAA</i>     | <i>TTC GAG TCA GCG CCA AGA TGT AGT T</i>   |
| <i>NKX2-1</i>  | <i>GCC AAA CTG CTG GAC GTC TTT CTT</i>     | <i>CCT TGA GAT TGG ATG CGC TTG GTT</i>     |
| <i>POU5F1</i>  | <i>ATG CAT TCA AAC TGA GGT GCC TGC</i>     | <i>CCA CCC TTT GTG TTC CCA ATT CCT</i>     |
| <i>PDGFRA</i>  | <i>GGCAGTACCCCATGTCTGAAG</i>               | <i>CGTCACAAAAAGGCCGCTG</i>                 |
| <i>RPL19</i>   | <i>CTCGATGCCGGAAAAACACC</i>                | <i>TTCTCTGGCATTCTGGGCATT</i>               |
| <i>SOX2</i>    | <i>GGA TAA GTA CAC GCT GCC CG</i>          | <i>ATG TGC GCG TAA CTG TCC AT</i>          |
| <i>TOP2A</i>   | <i>GCT GCC CCA AAA GGA ACT AA</i>          | <i>GGC GAT TCT TGG TTT TGG CA</i>          |
| <i>ZIC3</i>    | <i>TAT CAG TCT CGC GCT CAC</i>             | <i>TGT CTT TTG CGG TTT ATC TTC CTG</i>     |
